# Supplementary material for: Irisin directly stimulates osteoclastogenesis and bone resorption in vitro and in vivo
Source: eLife. 2020 Aug 11;9:e58172. doi: 10.7554/eLife.58172 (PMC7444909; doi:10.7554/eLife.58172)
Supplement: Supplementary file 1. [file elife-58172-supp1.xlsx]

## Sheet: Sheet1
	Forward	Reverse
Acp5	AGCAGCTCCCTAGAAGATGGA	GTAGGCAGTGACCCCGTATG
Adamts5	AAGAAGGTCGCACACGCTTA	AAGACCAGGCTGTGAGAAGC
Atp6vod2	GAGCTGTACTTCAATGTGGACCAT	TGAGTTAGGAGGCTGGCTTTG
Cfos	GGACAGCCTTTCCTACTACCATTCC	AAAGTTGGCACTAGAGACGGACAGA
Clcn7	AGAAAGTGTCTTGGTCCGGC	AGGAGCTTCTCGTTGTGTGG
Csrc	TTACCGACCCCGATCCCC	CCACCAGTCTCCCTCTCTGA
Cthrc1	CCAGGTCGGGATGGATTCAA	TCACAGAGTCCTTCCACAGAGG
Ctsk	GCAGGATGTGGGTGTTCAAGT	TCCGGAGACAGAGCAAAGCT
Dcstamp	CTGTTGCTTTGTGGCCTTCC	TCAAGTGAACTTCCAGCCCT
Fam102a	TGGCATGTTCCTGCTCTCTG	TCCTCTGGTAGTCCTGAGCC
Fndc5	GGCTGAAAAGATGGCCTCAAAG	GCTATAACACCTGCCCACATG
Itgav	GGAACAACGAAGCCTTAG	GTATCCATCTCTGACTGC
Itgb3	CTCCCTTCTTCCCTCCCCTC	ATCTCGATTACGGGACACGC
Itgb5	TGAGTTCGGGAGGATCTACG	AGTGACACTCTCCATGGCCT
Loxl2	TCTCACTTTGCCCGGGTCC	TCCGCGAGGCAAAGGTTTTA
Mmp2	GCCCCCATGAAGCCTTGTTT	GTCAGTATCAGCATCGGGGG
Nfatc	GCGAAGCCCAAGTCTCTTTCC	GTATGGACCAGAATGTGA
Nrf2	CCCGGTTGCCCACATTC	TGTCTCTGCCAAAAGCTGCAT
Postn	ACGTCGTGGACAAACTCCTC	GGTGTGTCTCCCTGAAGCAG
Rank	GCGTGCTGCTCGTTCCA	ATGCCTCTCCTGGGTGCAT
Rela	ATTTCCGCCTCTGGCGAATG	CACACTGGATCCCCAGGTTC
Rgs12	GCTGGATCTCGTTCCGATTAA	CCGCAACACTTCCGTGACT
Sparc	TGACCTAGACAACGACAAGTACATTG	TGCTCCTTGATGCCAAAGC
Tgfb2	TCCCCTCCGAAAATGCCATC	AGATGTGGGGTCTTCCCACT
Wnt1	CACTCATTGTCTGTGGCCCT	ACCATCGGCCACTACTGTTG
Wnt5A	ATGAACTGGGGGCATCTTGG	CGAGGAATTCAAGCGAAGCG
Wnt10a	ATGCGGATCCACAACAACAG	TTCCATGGCATTTGCACTTC
